# Supplementary material for: School Marketing: Plans, Practice and Perseverance.
Source: MDPI journal article supplement (doi:10.3390/ijerph192114538), 1997-01-01
Supplement: s1 [file s1]

Table S1: Correlation matrix for all variables in the models explaining COVID-19 attitudes.

|              | CV01   | CV02   | CV05   | CV06   | CV08   |
|--------------|--------|--------|--------|--------|--------|
| CV01         | 1.000  |        |        |        |        |
| CV02         | 0.463  | 1.000  |        |        |        |
| CV05         | 0.561  | 0.447  | 1.000  |        |        |
| CV06         | 0.365  | 0.301  | 0.534  | 1.000  |        |
| CV08         | 0.523  | 0.357  | 0.409  | 0.343  | 1.000  |
| CV14         | -0.318 | -0.026 | -0.217 | 0.003  | -0.321 |
| CV12         | -0.184 | 0.041  | -0.101 | -0.031 | -0.120 |
| CV13         | -0.105 | 0.125  | -0.084 | 0.015  | -0.096 |
| CV03         | 0.522  | 0.327  | 0.328  | 0.324  | 0.335  |
| CV04         | 0.266  | 0.233  | 0.304  | 0.313  | 0.262  |
| Female       | 0.042  | 0.014  | 0.103  | 0.005  | 0.090  |
| Income       | -0.004 | -0.097 | 0.005  | -0.042 | 0.151  |
| Internal     |        |        |        |        |        |
| migrant      | 0.004  | -0.095 | -0.031 | -0.045 | -0.013 |
| Worker       | -0.090 | -0.001 | -0.031 | 0.069  | -0.139 |
| Self-        |        |        |        |        |        |
| employed     | 0.036  | -0.003 | 0.093  | 0.040  | 0.051  |
| Civil        |        |        |        |        |        |
| servant      | -0.114 | 0.016  | -0.043 | -0.005 | -0.016 |
| Unemployed   |        |        |        |        |        |
| /other       | 0.027  | -0.007 | -0.075 | -0.043 | -0.073 |
| CV07         | -0.159 | -0.014 | -0.077 | -0.007 | -0.145 |
| D_2019       | 0.009  | 0.044  | -0.041 | 0.026  | 0.021  |
| D_2021       | -0.047 | 0.007  | -0.005 | 0.080  | 0.030  |
| G_2019       | 0.137  | 0.075  | 0.080  | 0.071  | 0.086  |
| G_2021       | 0.091  | 0.078  | 0.077  | 0.110  | 0.082  |
| Correlations |        |        |        |        |        |
|              | CV14   | CV12   | CV13   | CV03   | CV04   |
| CV14         | 1.000  |        |        |        |        |
| CV12         | 0.480  | 1.000  |        |        |        |
| CV13         | 0.515  | 0.214  | 1.000  |        |        |
| CV03         | -0.110 | -0.131 | 0.002  | 1.000  |        |
| CV04         | 0.021  | -0.017 | -0.011 | 0.514  | 1.000  |
| Female       | 0.047  | 0.028  | 0.000  | -0.010 | 0.061  |
| Income       | -0.227 | -0.132 | -0.063 | -0.140 | -0.098 |
| Internal     |        |        |        |        |        |
| migrant      | -0.168 | -0.147 | -0.143 | 0.037  | -0.053 |
| Worker       | 0.224  | 0.118  | 0.209  | 0.032  | 0.060  |
| Self-        |        |        |        |        |        |
| employed     | 0.021  | 0.013  | 0.030  | 0.008  | 0.005  |
| Civil        |        |        |        |        |        |
| servant      | 0.004  | -0.039 | -0.062 | -0.069 | 0.103  |
| Unemployed   |        |        |        |        |        |
| /other       | -0.009 | -0.021 | -0.028 | 0.053  | 0.063  |
| CV07         | 0.432  | 0.239  | 0.199  | -0.053 | 0.001  |

|        |       |        |        |       |       |
|--------|-------|--------|--------|-------|-------|
| D_2019 | 0.124 | 0.055  | 0.019  | 0.120 | 0.134 |
| D_2021 | 0.201 | 0.092  | 0.061  | 0.126 | 0.246 |
| G_2019 | 0.068 | -0.010 | -0.010 | 0.188 | 0.095 |
| G_2021 | 0.126 | 0.035  | 0.096  | 0.182 | 0.167 |

|                  | Correlations<br>Female | Income | Internal migrant | Worker | Self-employed |
|------------------|------------------------|--------|------------------|--------|---------------|
| Female           | 1.000                  |        |                  |        |               |
| Income           | -0.079                 | 1.000  |                  |        |               |
| Internal migrant | -0.070                 | 0.117  | 1.000            |        |               |
| Worker           | -0.149                 | -0.190 | -0.068           | 1.000  |               |
| Self-employed    | -0.044                 | 0.127  | -0.039           | -0.139 | 1.000         |
| Civil servant    | -0.081                 | 0.170  | 0.054            | -0.124 | -0.074        |
| Unemployed/other | 0.060                  | -0.249 | -0.056           | -0.109 | -0.067        |
| CV07             | -0.028                 | -0.080 | -0.152           | 0.127  | 0.046         |
| D_2019           | 0.073                  | -0.190 | 0.014            | -0.050 | -0.068        |
| D_2021           | 0.055                  | -0.248 | -0.018           | 0.028  | -0.050        |
| G_2019           | 0.251                  | -0.099 | -0.035           | 0.011  | 0.001         |
| G_2021           | 0.203                  | -0.116 | -0.029           | 0.011  | -0.056        |

|                  | Correlations<br>Civil servant | Unemployed/other | CV07   | D_2019 | D_2021 |
|------------------|-------------------------------|------------------|--------|--------|--------|
| Civil servant    | 1.000                         |                  |        |        |        |
| Unemployed/other | -0.059                        | 1.000            |        |        |        |
| CV07             | -0.014                        | 0.000            | 1.000  |        |        |
| D_2019           | 0.045                         | 0.035            | 0.114  | 1.000  |        |
| D_2021           | 0.009                         | 0.099            | 0.130  | 0.686  | 1.000  |
| G_2019           | -0.048                        | 0.018            | 0.043  | 0.537  | 0.400  |
| G_2021           | -0.035                        | 0.083            | -0.001 | 0.466  | 0.560  |

|        | Correlations<br>G_2019 | G_2021 |
|--------|------------------------|--------|
| G_2019 | 1.000                  |        |
| G_2021 | 0.693                  | 1.000  |

- cv01 I am afraid of becoming infected with COVID-19.
- cv02 I feel like I have little control over whether or not I get infected with COVID-19.
- cv03 I feel like I would not survive a COVID-19 infection.
- cv04 I feel like I have to give up because of COVID-19.
- cv05 I am afraid of infecting others with COVID-19.

cv06     My family and friends are afraid that they will get infected by me with COVID-19.

cv07     The German government has done the right things in dealing with COVID-19 (inverted).

cv08     COVID-19 worries me.

cv12     COVID-19 is not much worse than the annually recurring flu.

cv13     The actual background of the coronavirus disease will never come to light.

cv14     The COVID-19 crisis has been talked about in such a way that few can benefit from it.
